# Supplementary material
Source: PubMed Central journal article supplement (PMC3462286)

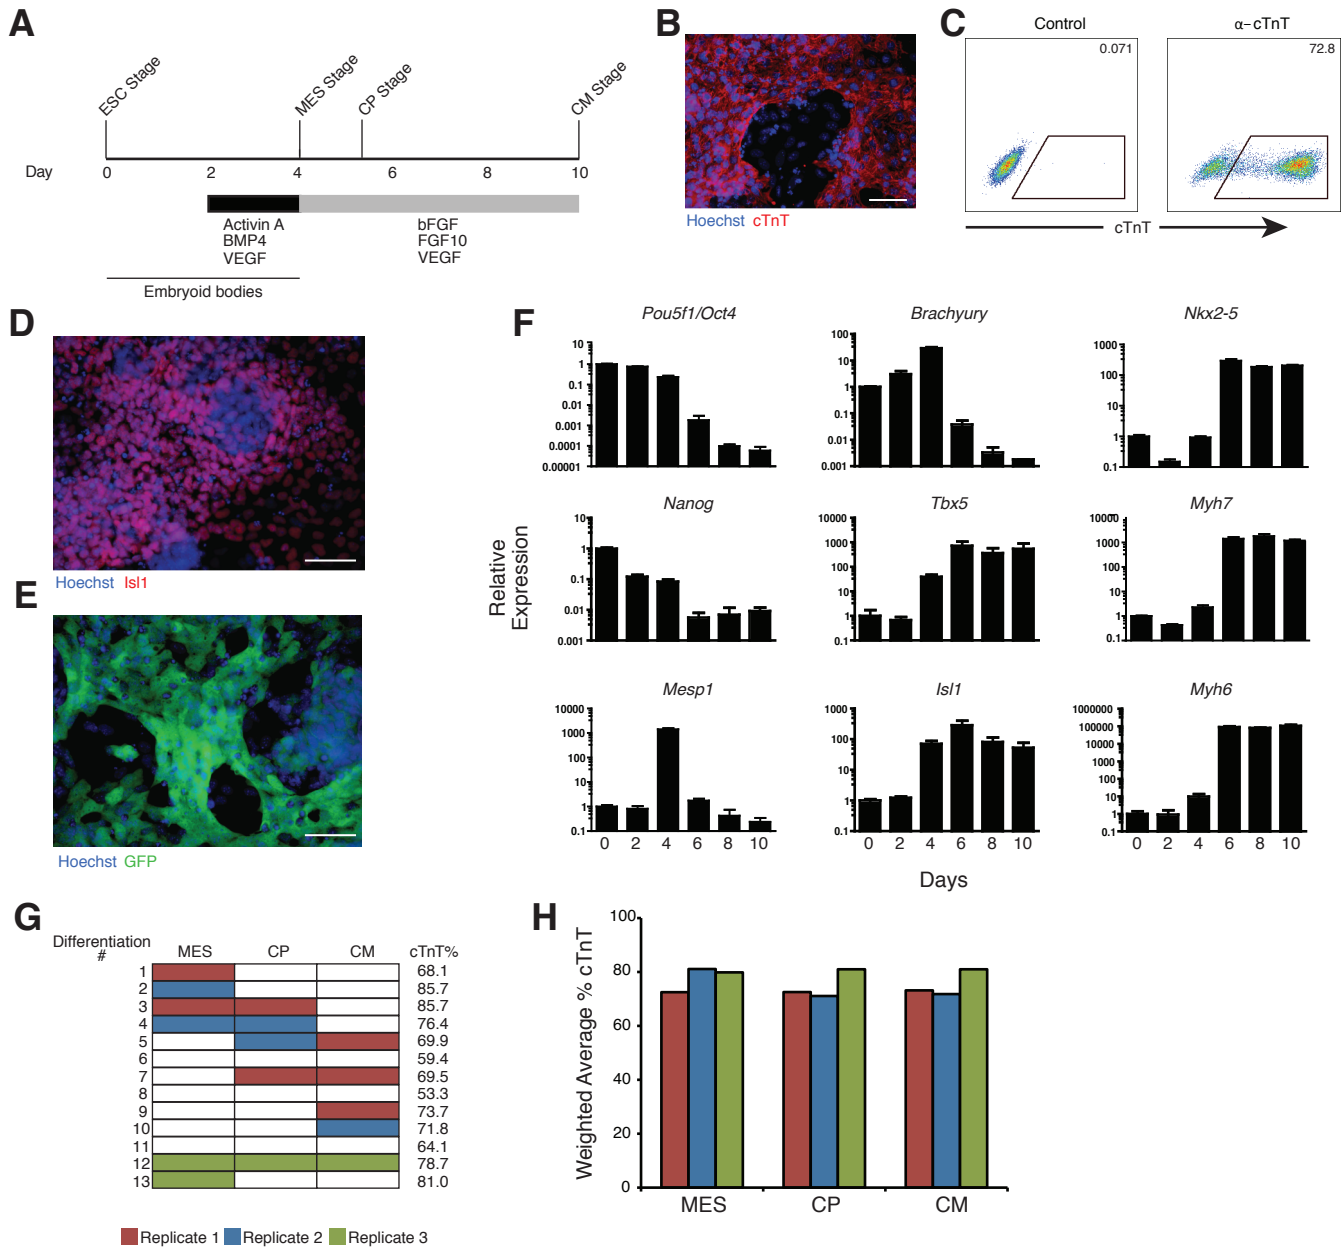

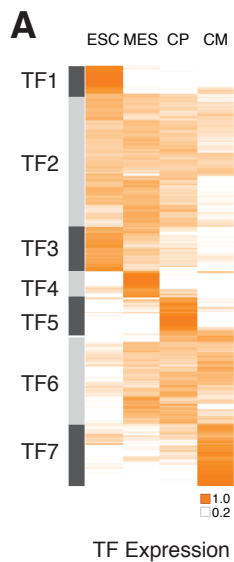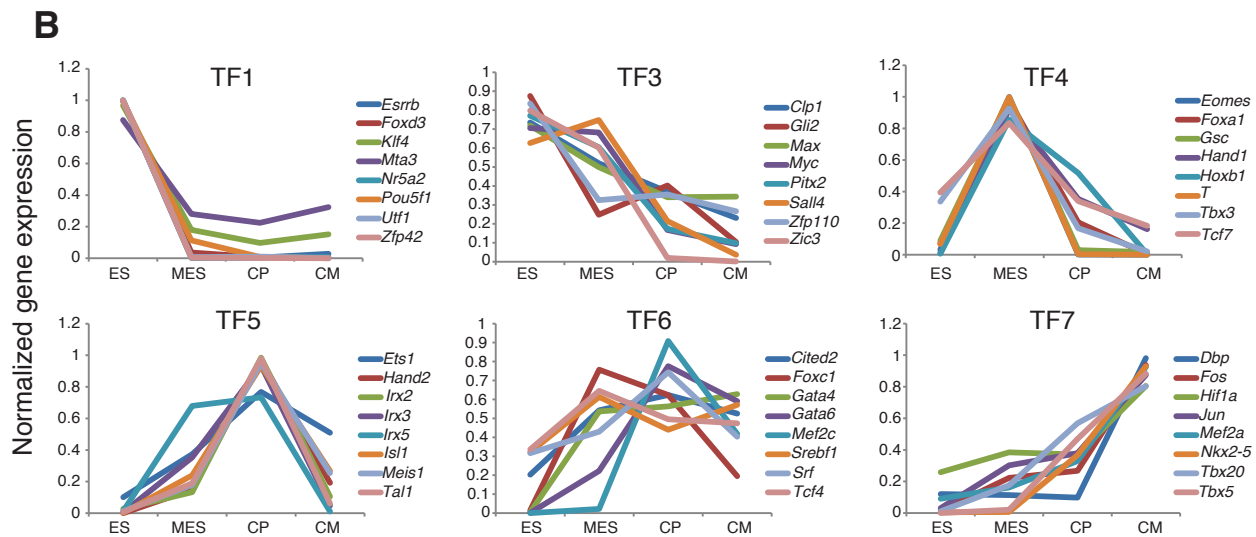

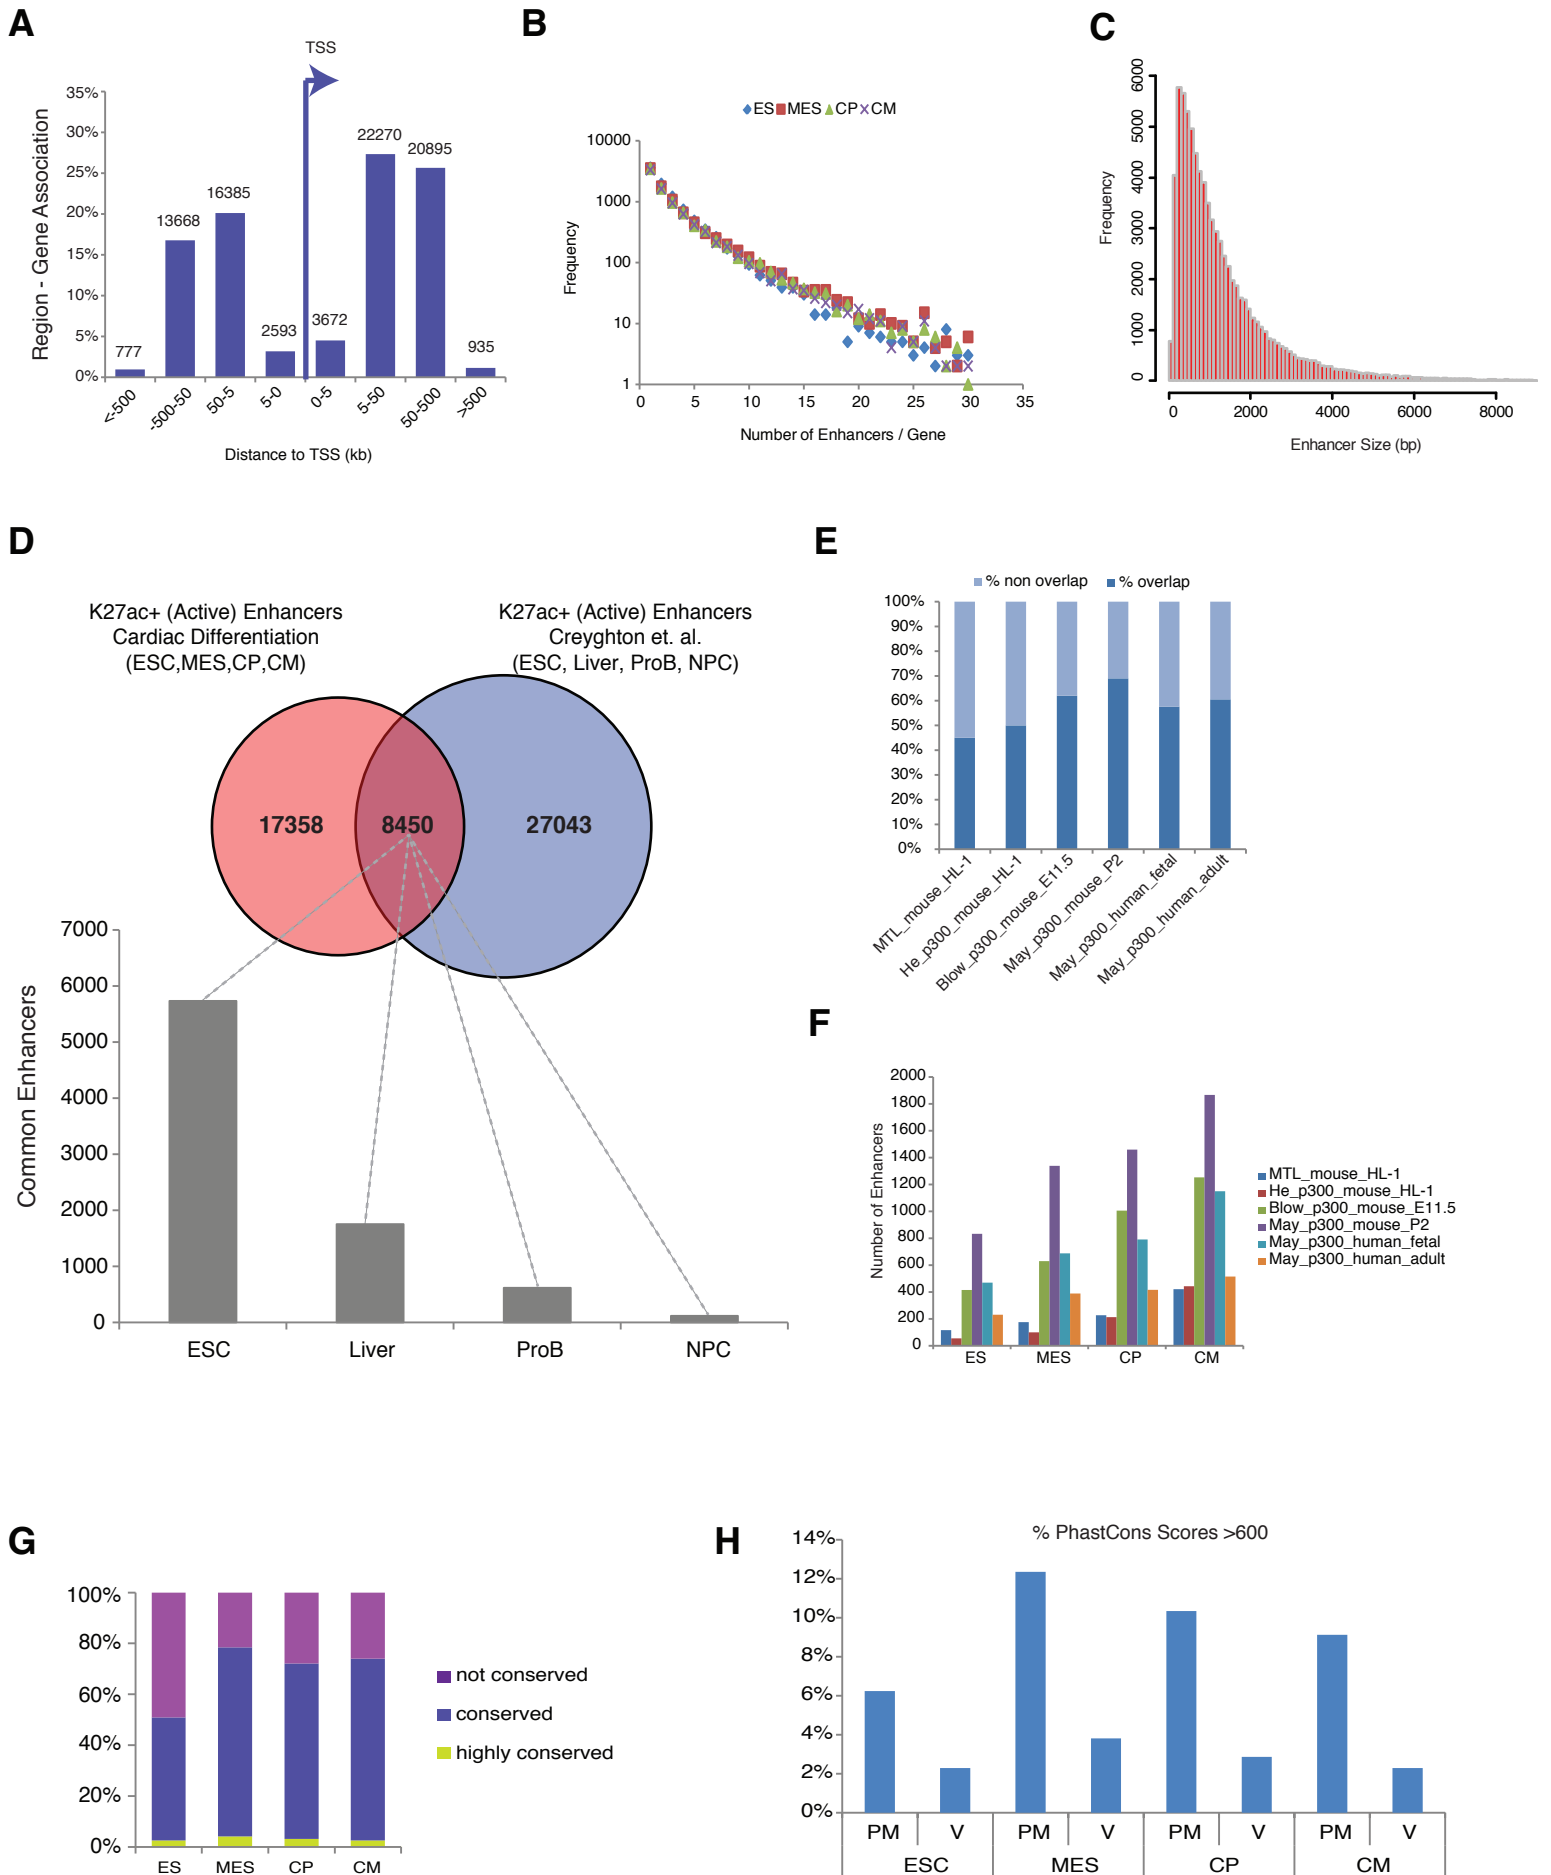

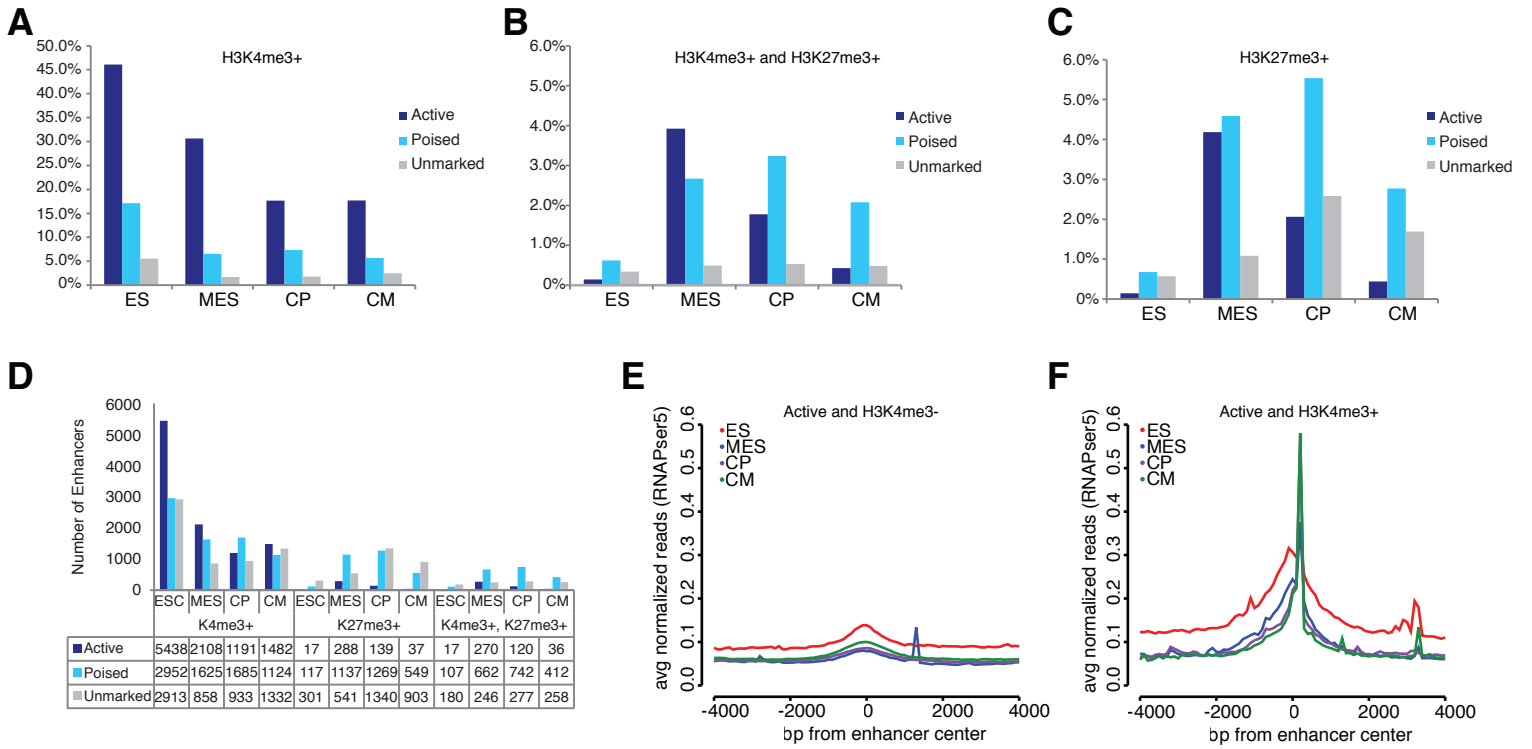

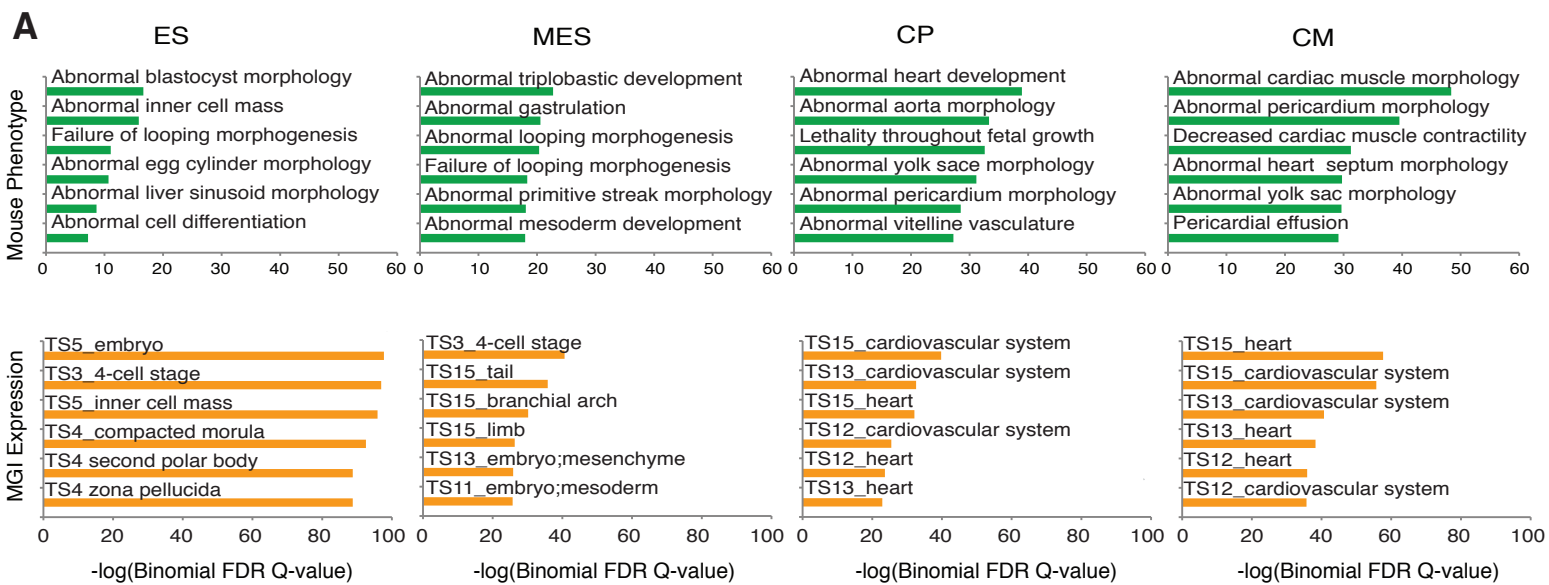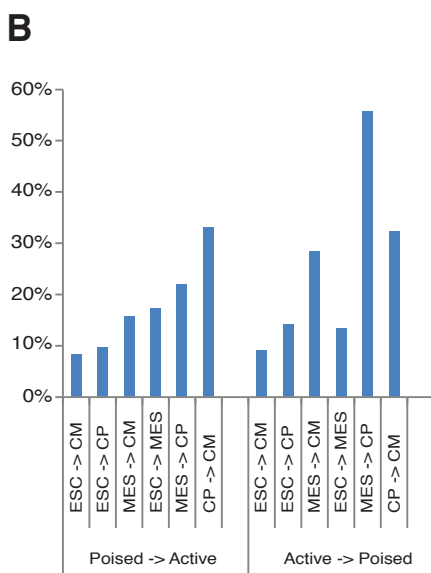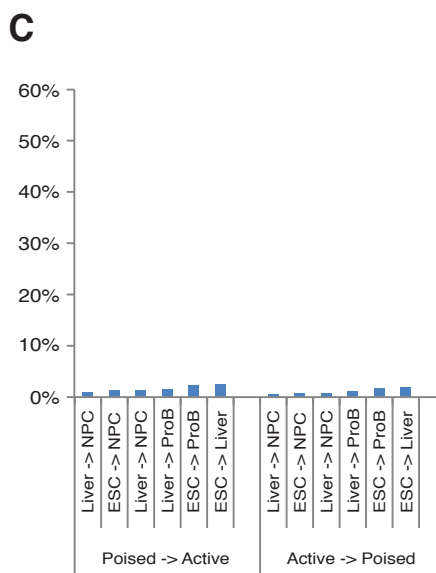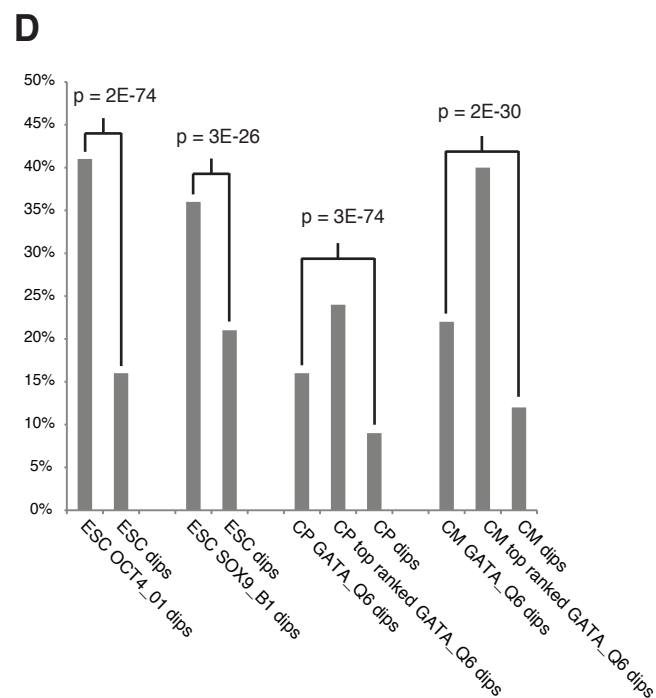

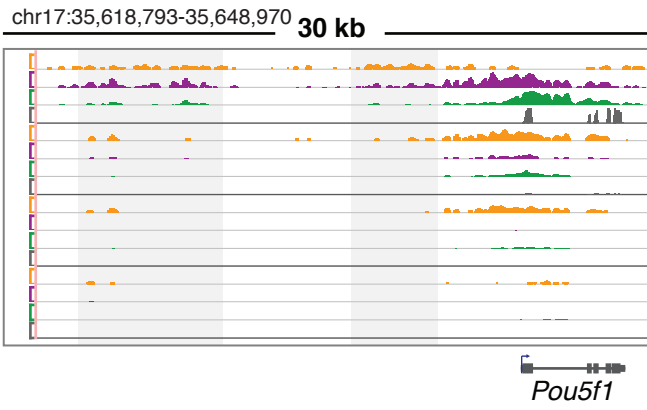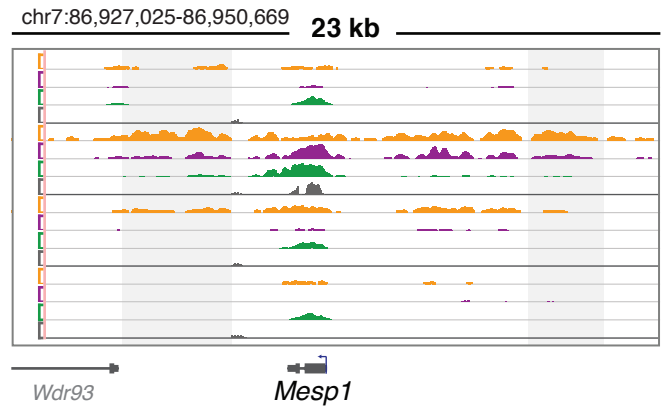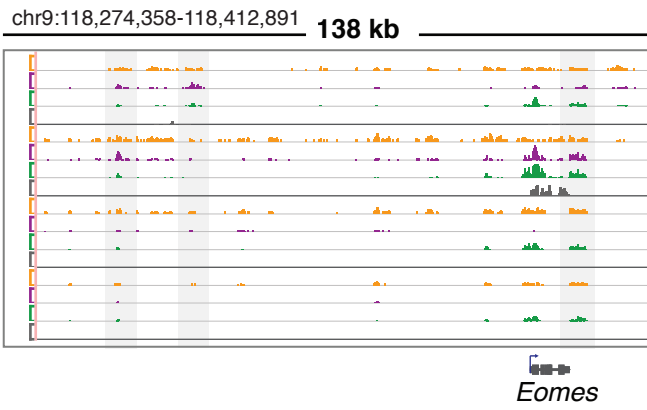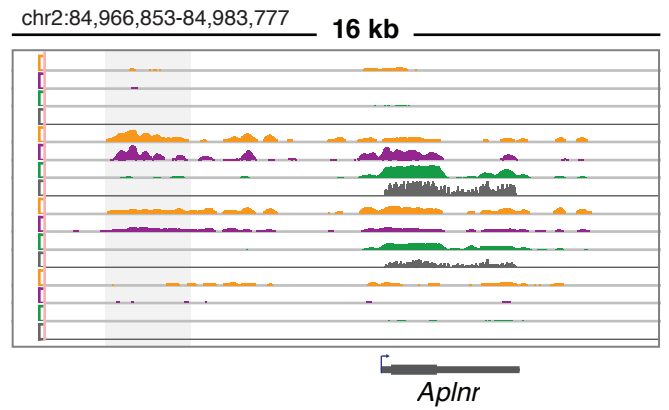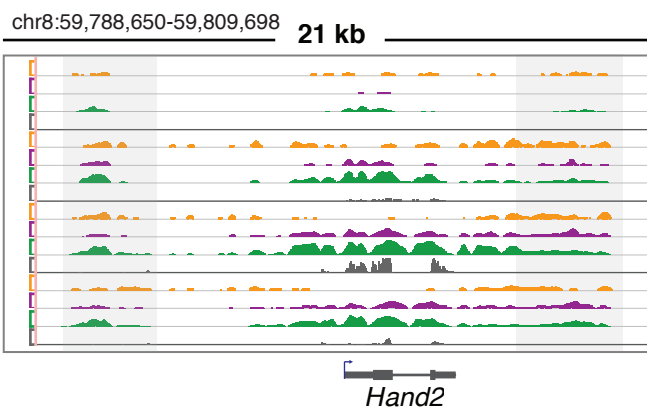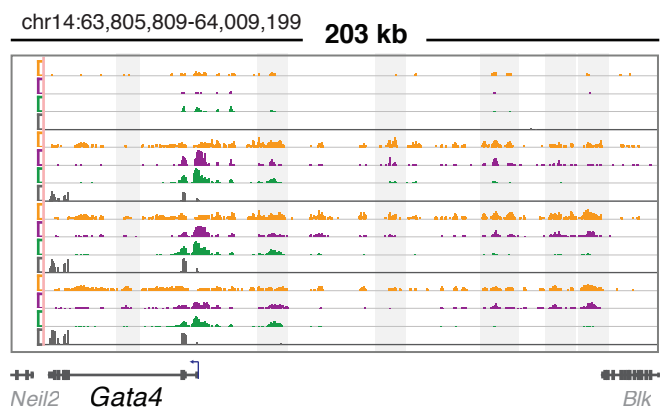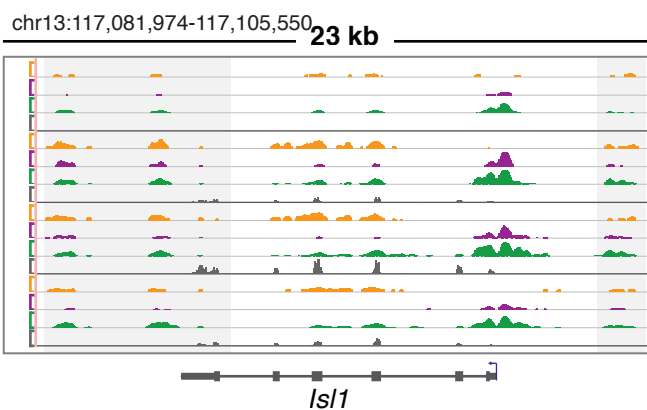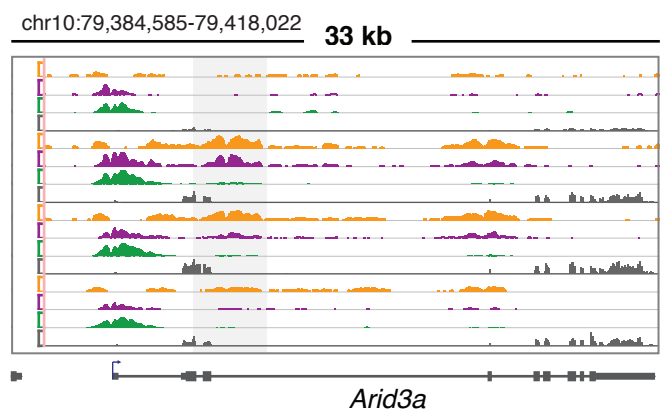

**A**

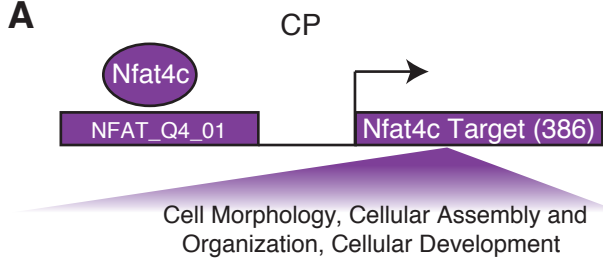

**B**

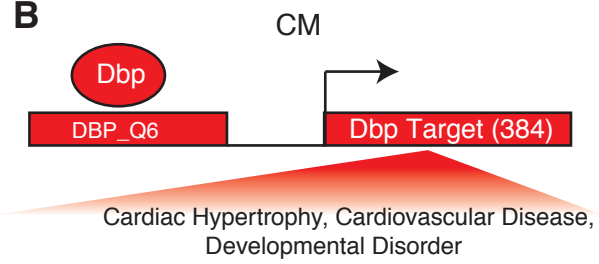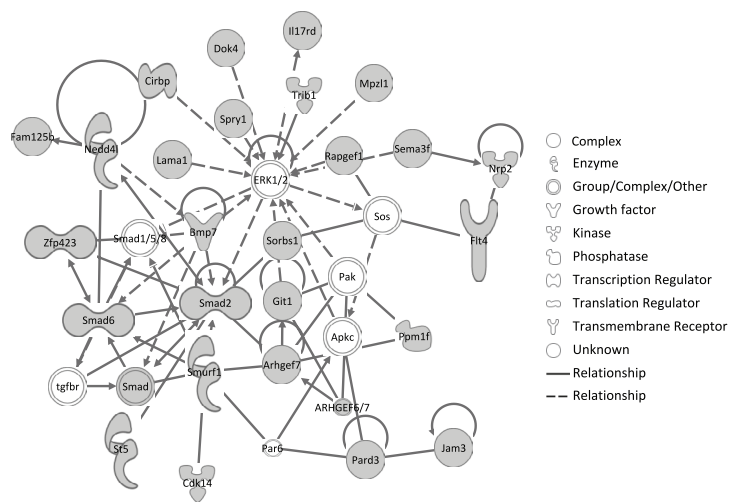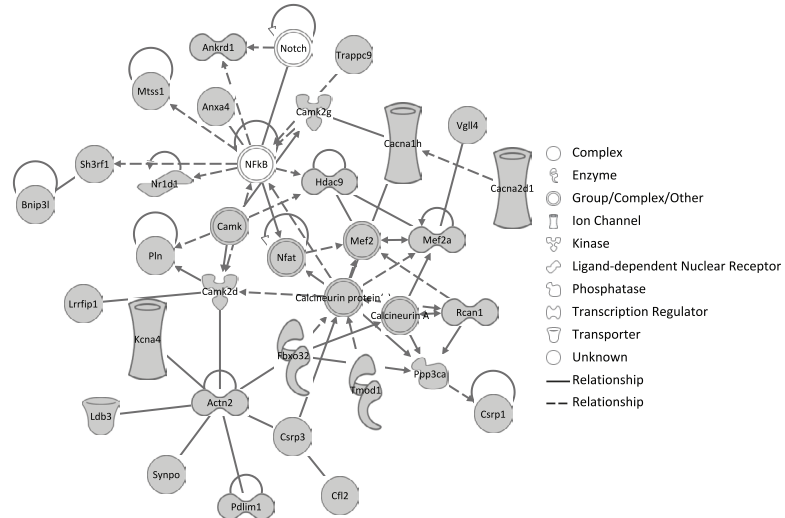

**C**

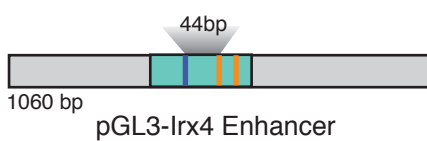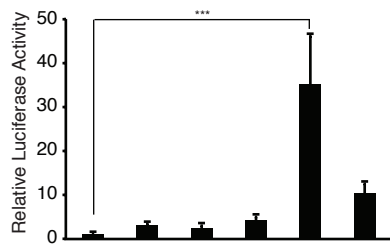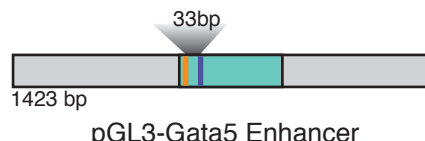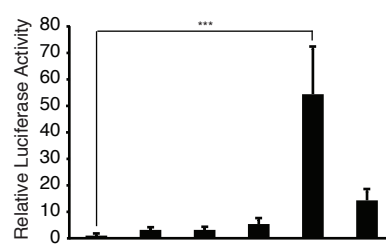

pGL3-Empty Vector

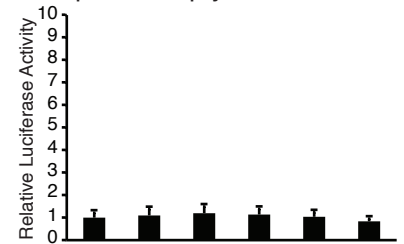

|               |   |   |   |   |   |   |
|---------------|---|---|---|---|---|---|
| <i>Meis1a</i> | - | + | - | - | + | - |
| <i>Meis2d</i> | - | - | + | - | - | + |
| <i>Gata4</i>  | - | - | - | + | + | + |

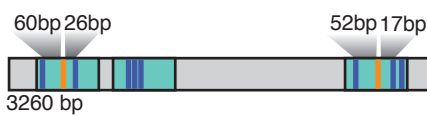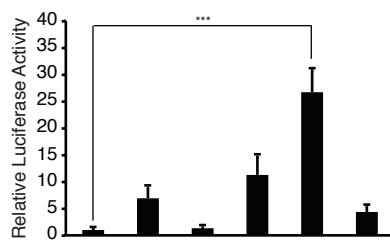

|               |   |   |   |   |   |   |
|---------------|---|---|---|---|---|---|
| <i>Meis1a</i> | - | + | - | - | + | - |
| <i>Meis2d</i> | - | - | + | - | - | + |
| <i>Gata4</i>  | - | - | - | + | + | + |

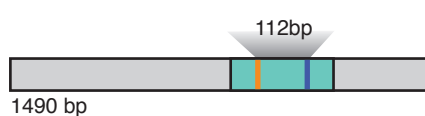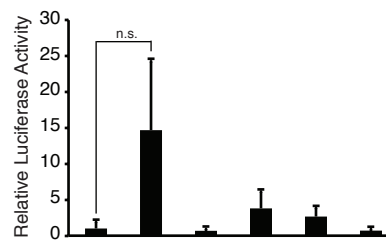

|               |   |   |   |   |   |   |
|---------------|---|---|---|---|---|---|
| <i>Meis1a</i> | - | + | - | - | + | - |
| <i>Meis2d</i> | - | - | + | - | - | + |
| <i>Gata4</i>  | - | - | - | + | + | + |

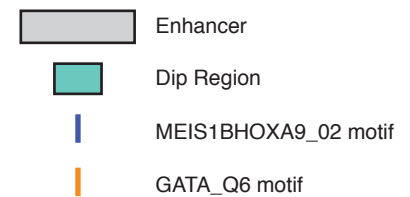

Supplement: NIHMS404976-supplement-02.pdf [file NIHMS404976-supplement-02.pdf]
